# Supplementary material for: Synchronous Extraction, Antioxidant Activity Evaluation, and Composition Analysis of Carbohydrates and Polyphenols Present in Artichoke Bud
Source: MDPI journal article supplement (doi:10.3390/molecules27248962), 2022-12-16
Supplement: s1 [file s1]

## Outline of the supplementary material

### Tables

**Table S1** HPLC conditions of carbohydrates and polyphenols.

### Figures

**Fig. S1** Influence of ultrasonic power (A), powder mass (B), extraction temperature (C), ultrasonic time (D), mass concentration of ammonium sulphate (E), and alcohol-to-water ratio (F) on the extraction of carbohydrates and polyphenols from artichoke bud.

**Fig. S2** *In vitro* antioxidant experimental evaluation of carbohydrates and polyphenols.

**Supplementary Table S1** HPLC conditions of carbohydrates and polyphenols.

| Condition                                          | carbohydrates                                                                                                                                                | Polyphenols                                                                                                                            |
|----------------------------------------------------|--------------------------------------------------------------------------------------------------------------------------------------------------------------|----------------------------------------------------------------------------------------------------------------------------------------|
| Chromatographic columns                            | Thermo Scientific™ Hypersil GOLD C <sub>18</sub> (ThermoFisher Scientific, MA, USA) (250 × 4.6 mm <sup>2</sup> , 5 μm)<br>A: 15% acetonitrile ( <i>v/v</i> ) | Agilent ZORBAX SB-C <sub>18</sub> (Agilent Technologies, CA, USA) (250 × 4.6 mm <sup>2</sup> , 5 μm)<br>A: methanol–acetonitrile (1:1) |
| Mobile phase                                       | B: 50 mmol/L phosphate buffer (KH <sub>2</sub> PO <sub>4</sub> –NaOH, pH = 6.0)                                                                              | B: 0.1% phosphoric acid solution                                                                                                       |
| Injection volume (μL)                              | 20                                                                                                                                                           | 10                                                                                                                                     |
| Temperature (°C)                                   | 30                                                                                                                                                           | 30                                                                                                                                     |
| Detection wavelength (nm)                          | 250                                                                                                                                                          | 327                                                                                                                                    |
| Flow rate (mL/min)                                 | 1.0                                                                                                                                                          | 1.0                                                                                                                                    |
| Time required for gradient elution                 | 0 → 9 → 35 → 45 → 55 min                                                                                                                                     | 0 → 15 → 45 → 60 min                                                                                                                   |
| Concentration of gradient elution (mobile phase A) | 100% → 92% → 80% → 75% → 100%                                                                                                                                | 15 % → 25 % → 25 % → 30 %                                                                                                              |

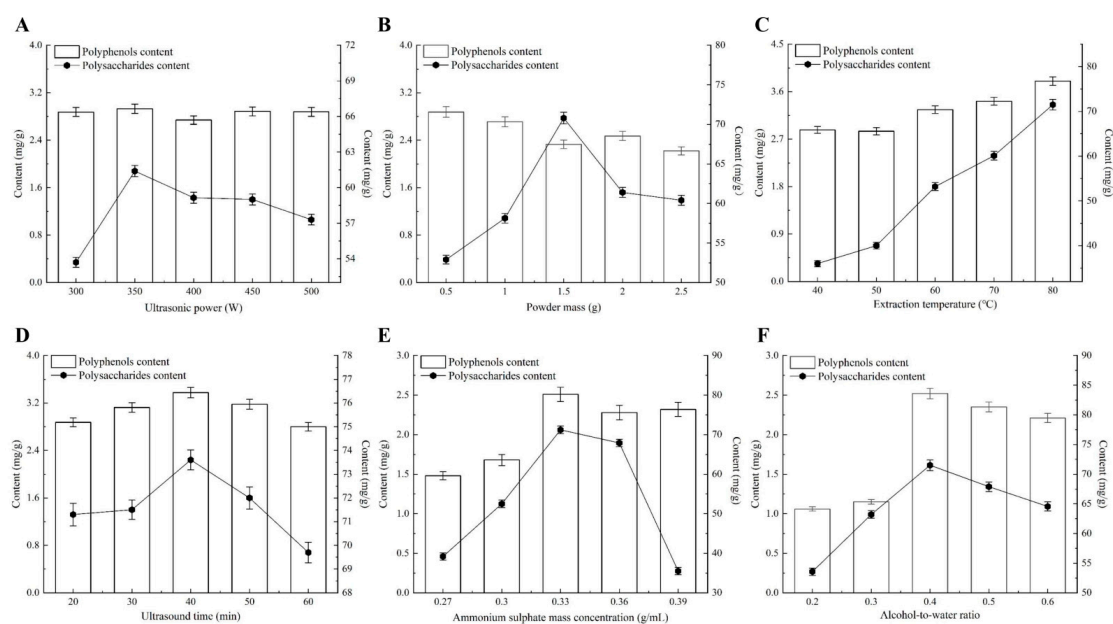

**Supplemental Fig. S1** Influence of ultrasonic power (A), powder mass (B), extraction temperature (C), ultrasonic time (D), mass concentration of ammonium sulphate (E), and alcohol-to-water ratio (F) on the extraction of carbohydrates and polyphenols from artichoke bud.

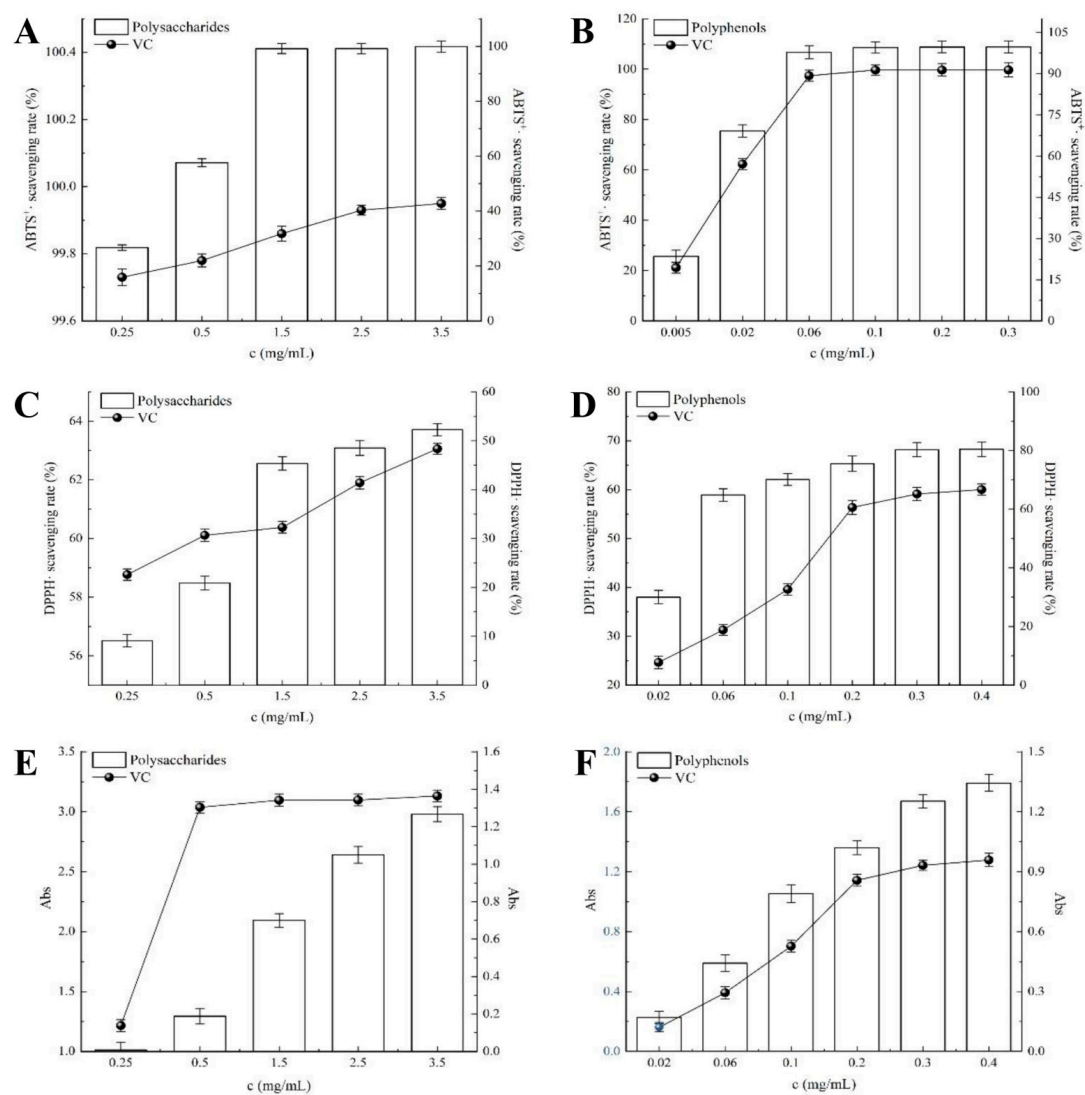

**Supplemental Fig. S2** *In vitro* antioxidant experimental evaluation of carbohydrates and polyphenols.
